# Supplementary material for: Difference in the action spectra for UVR8 monomerisation and HY5 transcript accumulation in Arabidopsis
Source: Royal Society of Chemistry journal article supplement (doi:10.1039/c8pp00138c), 2018-07-05
Supplement: c8pp00138c3.pdf [file c8pp00138c3.pdf]

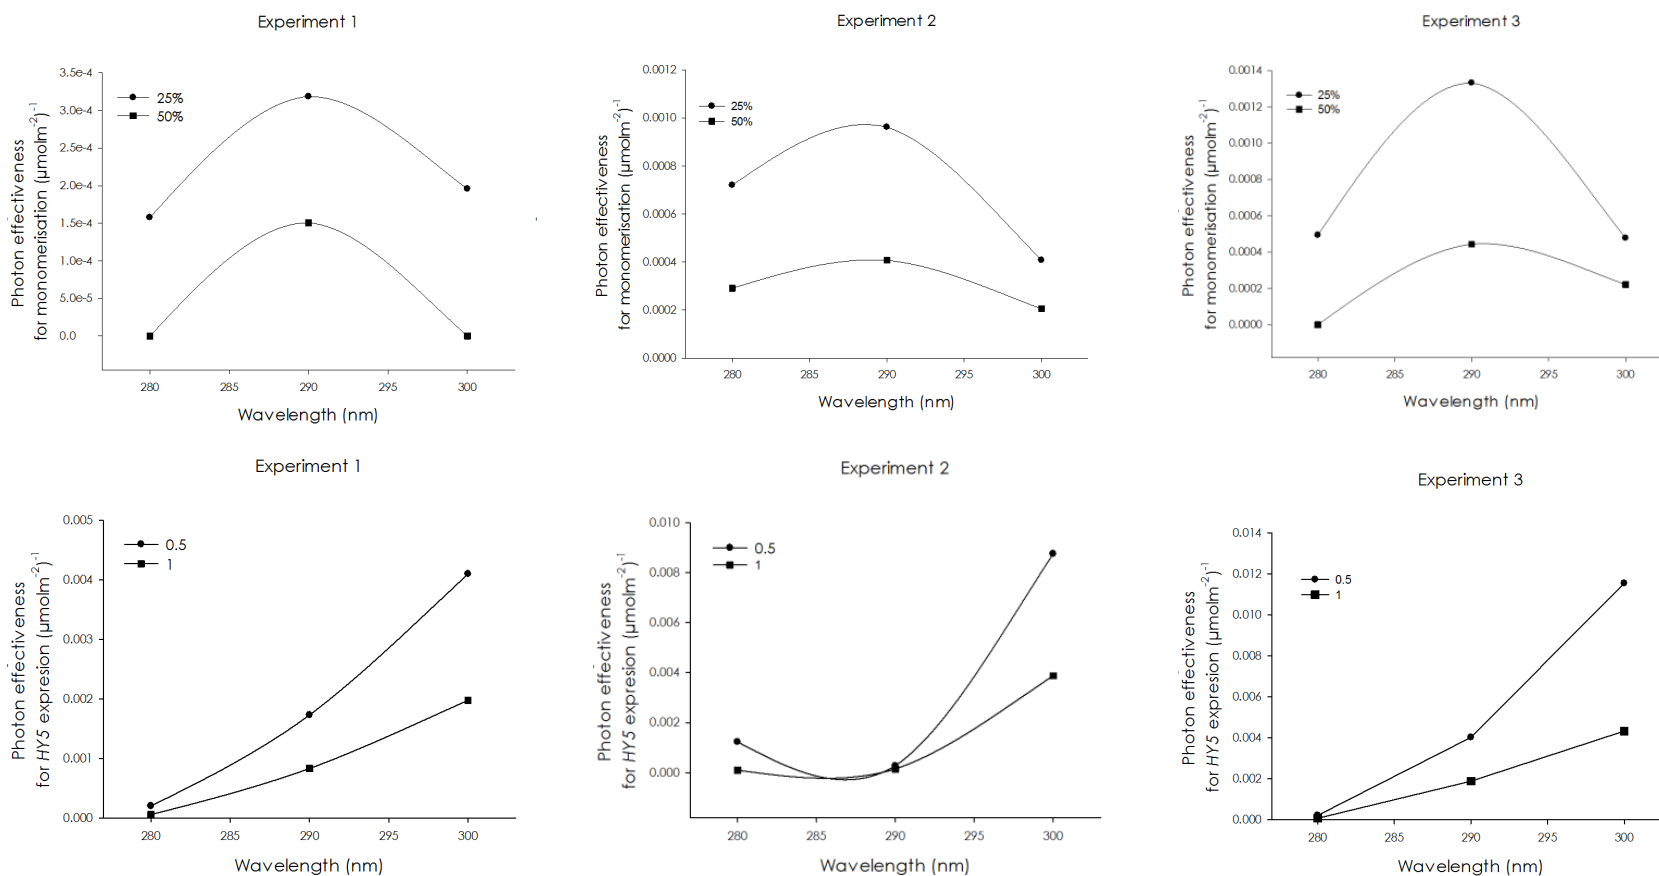

**Figure S4** Action spectra for UVR8 monomerisation and *HY5* expression compared in 3 separate experiments.

In each of 3 experiments, dose-response relationships for UVR8 monomer formation and *HY5* transcript accumulation were used to produce action spectra for different levels of response: 25% and 50% for monomer formation and 0.5 and 1.0 ddCt for *HY5* transcripts.
