# Supplementary material for: Difference in the action spectra for UVR8 monomerisation and HY5 transcript accumulation in Arabidopsis
Source: Royal Society of Chemistry journal article supplement (doi:10.1039/c8pp00138c), 2018-07-05
Supplement: c8pp00138c4.pdf [file c8pp00138c4.pdf]

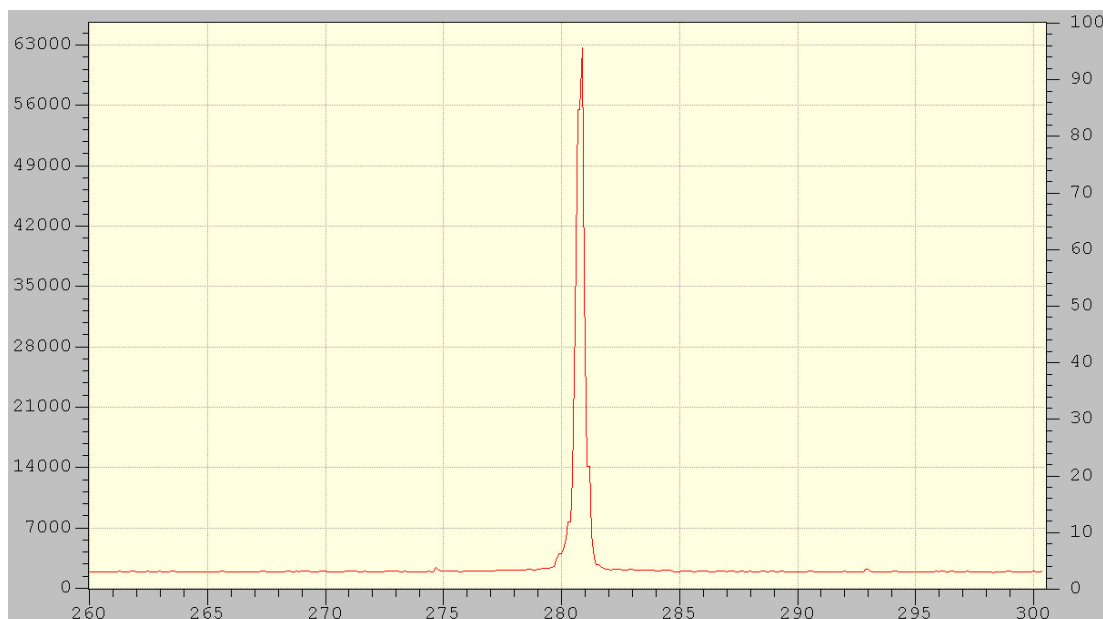

### Supplementary Figure 1

A representative example of the 0.4 nm half-band width of the tunable Opolette 355+UV laser used in this study as measured by an array spectrometer (Spectral Products SM440). Measurement of the emission (in arbitrary units) at 281 nm.
